# Supplementary material
Source: Springer Nature journal article supplement (https://www.springermedizin.de/resource/supplementary/13046_2011_486_MOESM3_ESM.pdf/9662334)

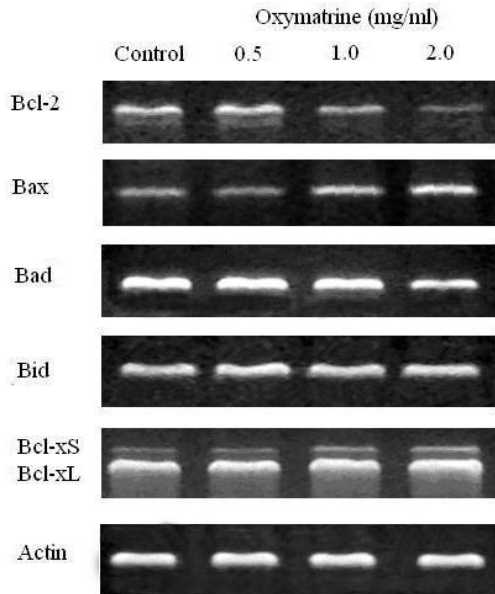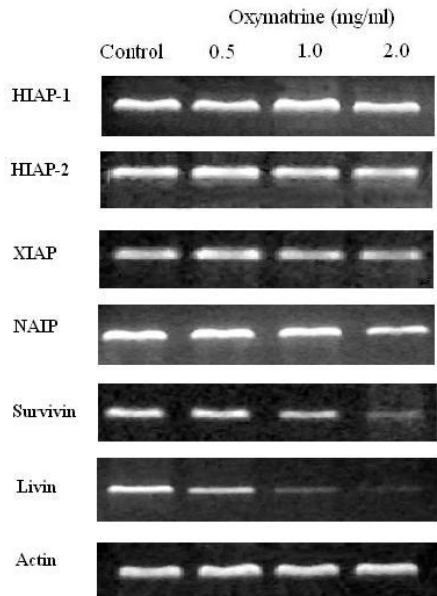

Supplement: MOESM3 [file 9662334]
